# Supplementary material
Source: PubMed Central journal article supplement (PMC5846190)
Supplement: NIHMS947268-supplement-supplement_1.pdf [file NIHMS947268-supplement-supplement_1.pdf]

**TABLE S1** Correlation Matrix for Within Wave (Waves 1–3) Correlations Among Youth Antisocial Behaviors (YASB), Parental Risks (Composite, Parental Psychopathology, Lack of Social Support, and Cultural Stress), Parenting Behaviors (Monitoring, Warmth, and Coercive Discipline), and Youth Cultural Stress

|                                 | YASB  | Parental Risk Composite | Parental Psychopathology | Parental Lack of Social Support | Parental Cultural Stress | Parental Warmth | Parental Monitoring | Parental Discipline | Youth Cultural Stress |
|---------------------------------|-------|-------------------------|--------------------------|---------------------------------|--------------------------|-----------------|---------------------|---------------------|-----------------------|
| Wave 1 (n = 1,150)              |       |                         |                          |                                 |                          |                 |                     |                     |                       |
| YASB                            |       |                         |                          |                                 |                          |                 |                     |                     |                       |
| Parental Risk Composite         | 0.18  |                         |                          |                                 |                          |                 |                     |                     |                       |
| Parental Psychopathology        | 0.15  | 0.61                    |                          |                                 |                          |                 |                     |                     |                       |
| Parental Lack of Social Support | 0.08  | 0.61                    | 0.01                     |                                 |                          |                 |                     |                     |                       |
| Parental Cultural Stress        | 0.10  | 0.66                    | 0.12                     | 0.13                            |                          |                 |                     |                     |                       |
| Parental Warmth                 | -0.42 | -0.18                   | -0.09                    | -0.07                           | -0.17                    |                 |                     |                     |                       |
| Parental Monitoring             | -0.20 | -0.11                   | -0.06                    | -0.07                           | -0.07                    | 0.33            |                     |                     |                       |
| Parental Discipline             | 0.29  | 0.10                    | 0.06                     | 0.03                            | 0.09                     | -0.40           | -0.18               |                     |                       |
| Youth Cultural Stress           | 0.12  | 0.01                    | 0.05                     | -0.10                           | 0.07                     | -0.11           | -0.08               | 0.08                |                       |
| Wave 2 (n = 1,150)              |       |                         |                          |                                 |                          |                 |                     |                     |                       |
| YASB                            |       |                         |                          |                                 |                          |                 |                     |                     |                       |
| Parental Risk Composite         | 0.15  |                         |                          |                                 |                          |                 |                     |                     |                       |
| Parental Psychopathology        | 0.08  | 0.61                    |                          |                                 |                          |                 |                     |                     |                       |
| Parental Lack of Social Support | 0.10  | 0.63                    | 0.06                     |                                 |                          |                 |                     |                     |                       |
| Parental Cultural Stress        | 0.10  | 0.64                    | 0.07                     | 0.12                            |                          |                 |                     |                     |                       |
| Parental Warmth                 | -0.48 | -0.21                   | -0.09                    | -0.16                           | -0.15                    |                 |                     |                     |                       |
| Parental Monitoring             | -0.23 | -0.19                   | -0.10                    | -0.14                           | -0.11                    | 0.37            |                     |                     |                       |
| Parental Discipline             | 0.30  | 0.12                    | 0.05                     | 0.09                            | 0.08                     | -0.46           | -0.13               |                     |                       |
| Youth Cultural Stress           | 0.08  | 0.01                    | 0.01                     | -0.06                           | 0.07                     | -0.08           | -0.06               | 0.11                |                       |
| Wave 3 (n = 1,082)              |       |                         |                          |                                 |                          |                 |                     |                     |                       |
| YASB                            |       |                         |                          |                                 |                          |                 |                     |                     |                       |
| Parental Risk Composite         | 0.18  |                         |                          |                                 |                          |                 |                     |                     |                       |
| Parental Psychopathology        | 0.15  | 0.64                    |                          |                                 |                          |                 |                     |                     |                       |
| Parental Lack of Social Support | 0.15  | 0.65                    | 0.11                     |                                 |                          |                 |                     |                     |                       |
| Parental Cultural Stress        | 0.04  | 0.65                    | 0.10                     | 0.15                            |                          |                 |                     |                     |                       |
| Parental Warmth                 | -0.40 | -0.18                   | -0.15                    | -0.12                           | -0.09                    |                 |                     |                     |                       |
| Parental Monitoring             | -0.18 | -0.14                   | -0.07                    | -0.13                           | -0.07                    | 0.36            |                     |                     |                       |
| Parental Discipline             | 0.23  | 0.11                    | 0.06                     | 0.11                            | 0.05                     | -0.42           | -0.17               |                     |                       |
| Youth Cultural Stress           | 0.10  | 0.03                    | 0.03                     | 0.01                            | 0.02                     | -0.08           | -0.03               | 0.05                |                       |

Note: All correlations  $\geq 0.06$  are statistically significant at  $\alpha = .05$ .
